# Supplementary material for: Retrospective Claims Analysis Indirectly Comparing Medication Adherence and Persistence Between Intravenous Biologics and Oral Small-Molecule Therapies in Inflammatory Bowel Diseases
Source: PubMed Central journal article supplement — Adv Ther. 2019 Aug 5;36(9):2260–72. doi: 10.1007/s12325-019-01037-x (PMC6822974; doi:10.1007/s12325-019-01037-x), 2019-08-05

## Supplementary Tables and Figures

### Tables

**Table S1.** Multivariable Generalized Linear Model for Mean PDC and CG20 Adjusted by Difference Between Infliximab/IBD and Infliximab/RA

|                                                                | Crude Model                 |                      | Adjusted Model                           |                      |
|----------------------------------------------------------------|-----------------------------|----------------------|------------------------------------------|----------------------|
|                                                                | LS Mean Difference (95% CI) | P Value <sup>a</sup> | LS Mean Difference <sup>b</sup> (95% CI) | P Value <sup>a</sup> |
| <b>PDC</b>                                                     |                             |                      |                                          |                      |
| Difference in mean PDC for VDZ vs TOF                          | 9.6 (6.6 to 12.6)           | <0.0001              | 10.2 (6.9 to 13.4)                       | <0.0001              |
| Adjusted for difference in mean PDC between IFX/IBD and IFX/RA | 5.0 (0.6 to 9.4)            | 0.0245               | 4.7 (0.3 to 9.0)                         | 0.0376               |
| Comparisons between disease states                             |                             |                      |                                          |                      |
| Difference in mean PDC for IFX/IBD vs IFX/RA                   | 4.5 (1.3 to 7.7)            | 0.0054               | 5.5 (2.0 to 9.0)                         | 0.0021               |

|                                                                 |                        |         |                        |         |
|-----------------------------------------------------------------|------------------------|---------|------------------------|---------|
| Comparisons within disease state                                |                        |         |                        |         |
| IBD: Difference in mean PDC for VDZ vs IFX                      | -1.8 (-4.8 to 1.2)     | 0.2331  | -2.2 (-5.2 to 0.8)     | 0.1545  |
| RA: Difference in mean PDC for IFX vs TOF                       | 6.8 (3.6 to 10.0)      | <0.0001 | 6.8 (3.6 to 10.0)      | <0.0001 |
| <b>CG20</b>                                                     |                        |         |                        |         |
| Difference in VDZ vs TOF                                        | -31.5 (-42.3 to -20.7) | <0.0001 | -32.7 (-44.3 to -21.0) | <0.0001 |
| Adjusted for difference in mean CG20 between IFX/IBD and IFX/RA | -16.0 (-31.8 to -0.2)  | 0.0475  | -14.9 (-30.8 to 0.9)   | 0.0646  |
| Comparisons between disease states                              |                        |         |                        |         |
| IFX/IBD vs IFX/RA                                               | -15.5 (-27.0 to -4.0)  | 0.0083  | -17.7 (-30.4 to -5.0)  | 0.0062  |
| Comparisons within disease state                                |                        |         |                        |         |
| IBD: Difference in mean                                         | 4.7 (-6.1 to           | 0.3960  | 5.7 (-5.2 to           | 0.3057  |

|                                               |                          |        |                          |        |
|-----------------------------------------------|--------------------------|--------|--------------------------|--------|
| CG20 for VDZ vs IFX                           | 15.5)                    |        | 16.5)                    |        |
| RA: Difference in mean<br>CG20 for IFX vs TOF | -20.6 (-32.2<br>to -9.1) | 0.0005 | -20.6 (-32.1<br>to -9.1) | 0.0005 |

<sup>a</sup> $P < 0.05$  was considered statistically significant.

<sup>b</sup>Adjusted for age, sex, and prior hospitalization during the baseline period, as these variables were found to be significant in the initial model ( $P < 0.10$ ).

Abbreviations: CG20, cumulative days with gap  $\geq 20\%$  beyond the expected interval; CI, confidence interval; IBD, inflammatory bowel disease; IFX, infliximab; LS, least-squares; PDC, proportion of days covered; RA, rheumatoid arthritis; TOF, tofacitinib; VDZ, vedolizumab.

**Table S2.** Logistic Regression Analysis for the Proportion of Patients With PDC  $\geq 80\%$

|                                                      | <b>Crude Model: OR<br/>(95% CI)</b> | <b>Adjusted Model<sup>a</sup>: OR<br/>(95% CI)</b> |
|------------------------------------------------------|-------------------------------------|----------------------------------------------------|
| Proportion with PDC $\geq 80\%$ in VDZ vs TOF        | 1.9 (1.5-2.4)                       | 2.1 (1.6-2.6)                                      |
| <b>Comparisons between disease states</b>            |                                     |                                                    |
| Proportion with PDC $\geq 80\%$ in IFX/IBD vs IFX/RA | 1.6 (1.3-2.1)                       | 1.8 (1.4-2.3)                                      |
| <b>Comparisons within disease state</b>              |                                     |                                                    |
| IBD: Proportion with PDC $\geq 80\%$ in VDZ vs IFX   | 0.7 (0.6-0.9)                       | 0.7 (0.6-0.9)                                      |
| RA: Proportion with PDC $\geq 80\%$ in IFX vs TOF    | 1.7 (1.3-2.1)                       | 1.7 (1.3-2.1)                                      |

<sup>a</sup>Adjusted for prior hospitalization at baseline, as these variables were found to be significant in the initial model ( $P < 0.10$ ).

Abbreviations: CI, confidence interval; IBD, inflammatory bowel disease; IFX, infliximab; OR, odds ratio; PDC, proportion of days covered; RA, rheumatoid arthritis; TOF, tofacitinib; VDZ, vedolizumab.

**Table S3.** Multivariable Adjusted Cox Proportional Hazards Model (Time to Treatment Discontinuation)<sup>a</sup>

|                                            | <b>Adjusted Model: HR (95% CI)</b> |
|--------------------------------------------|------------------------------------|
| Time to discontinuation, VDZ vs TOF        | 0.7 (0.6-0.9)                      |
| Sensitivity analysis                       | 0.7 (0.6-0.8)                      |
| Between-disease-state comparisons          |                                    |
| Time to discontinuation, IFX/IBD vs IFX/RA | 0.8 (0.6-0.9)                      |
| Sensitivity analysis <sup>b</sup>          | 0.7 (0.6-0.9)                      |
| Within-disease-state comparisons           |                                    |
| IBD: VDZ vs IFX                            | 1.3 (1.1-1.6)                      |
| Sensitivity analysis <sup>b</sup>          | 1.3 (1.1-1.5)                      |
| RA: IFX vs TOF                             | 0.7 (0.6-0.9)                      |
| Sensitivity analysis <sup>b</sup>          | 0.7 (0.6-0.9)                      |

<sup>a</sup>Model includes treatment/diagnosis group, hospitalization, and Quan-Charlson Comorbidity Index (excluding RA).

<sup>b</sup>Discontinuation defined as a gap in therapy  $\geq 0.5$  times the prior supply.

## Figures

**Figure S1.** Study design. The study groups are defined by diagnosis (UC, CD, or RA) and index therapy (vedolizumab, infliximab, or tofacitinib). The primary comparison was between the vedolizumab/IBD and tofacitinib/RA groups; however, comparison between the infliximab/IBD and infliximab/RA groups was conducted to validate the primary comparison.

Abbreviations: CD, Crohn's disease; IBD, inflammatory bowel disease; IFX, infliximab; RA, rheumatoid arthritis; TOF, tofacitinib; UC, ulcerative colitis; VDZ, vedolizumab.

Sunanda Kane; Suppl Figure 1; Figure S1

S1

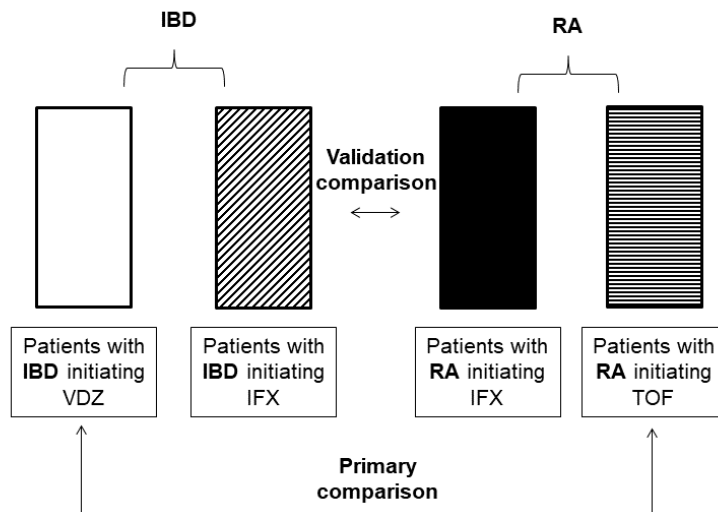

**Figure S2.** Proportion of persistent patients initiating vedolizumab, infliximab, or tofacitinib after 12 months of follow-up. Nonpersistence was defined as a gap in therapy  $\geq 0.5$  times the prior day's supply, beginning from the end of the last supply.

Abbreviations: IBD, inflammatory bowel disease; IFX, infliximab; RA, rheumatoid arthritis; TOF, tofacitinib; VDZ, vedolizumab.

Sunanda Kane; Suppl Figure 2; Figure S2

S2

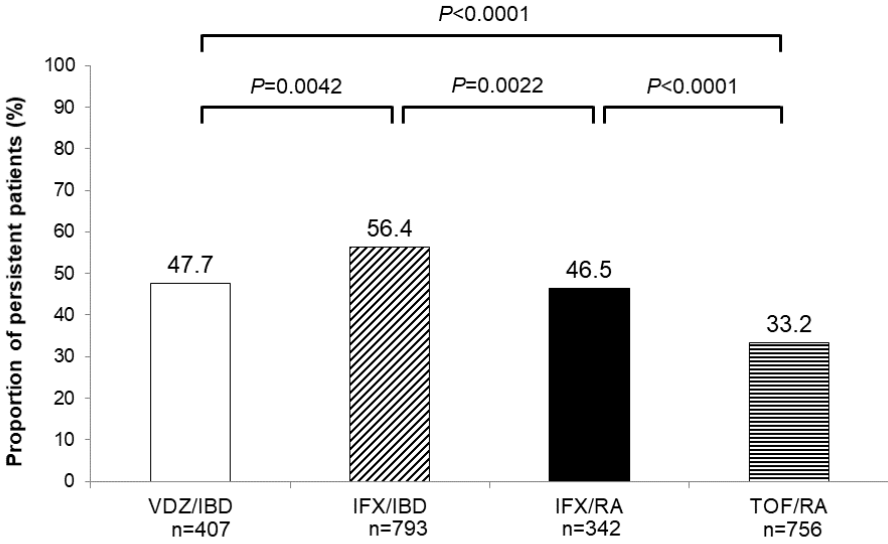

**Figure S3.** Proportion of persistent biologic-naïve patients initiating vedolizumab, infliximab, or tofacitinib after 12 months of follow-up. Nonpersistence was defined as gap in therapy  $\geq 1.5$  times **(A)** or  $\geq 0.5$  times **(B)** the prior day's supply, beginning from the end of the last supply. Abbreviations: IBD, inflammatory bowel disease; IFX, infliximab; RA, rheumatoid arthritis; TOF, tofacitinib; VDZ, vedolizumab.

Sunanda Kane; Suppl Figure 3A; Figure S3A

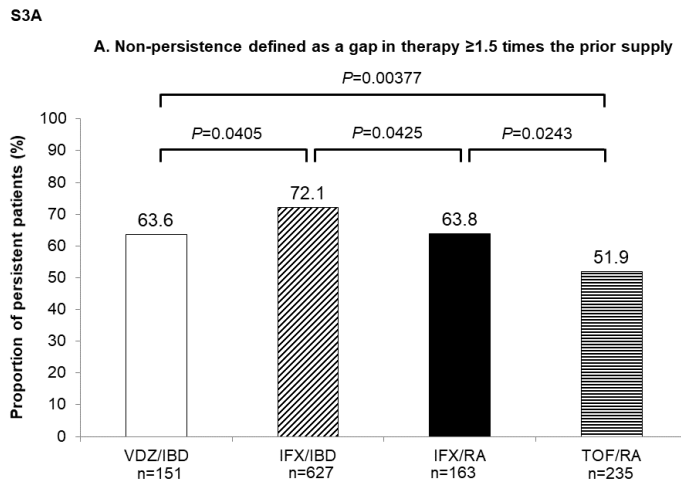

Sunanda Kane; Suppl Figure 3B; Figure S3B

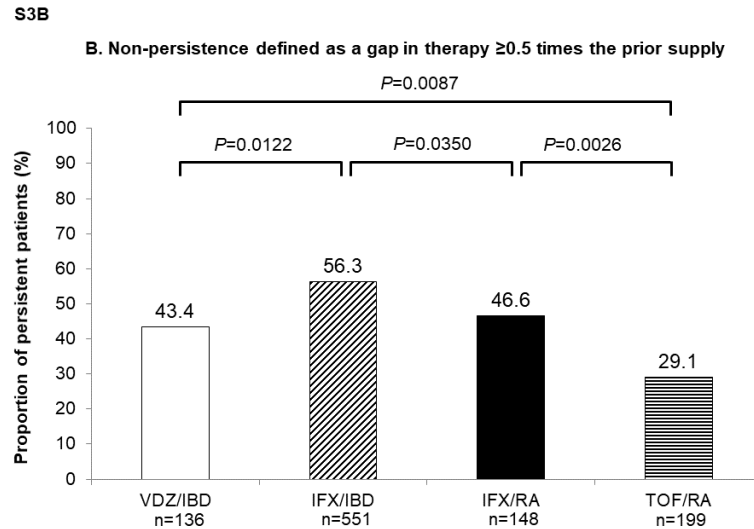



**Figure S4.** Kaplan-Meier survival curve for time to discontinuation among biologic-naïve patients initiating vedolizumab compared with tofacitinib.

Abbreviations: CD, Crohn's disease; RA, rheumatoid arthritis; TOF, tofacitinib; UC, ulcerative colitis; VDZ, vedolizumab.

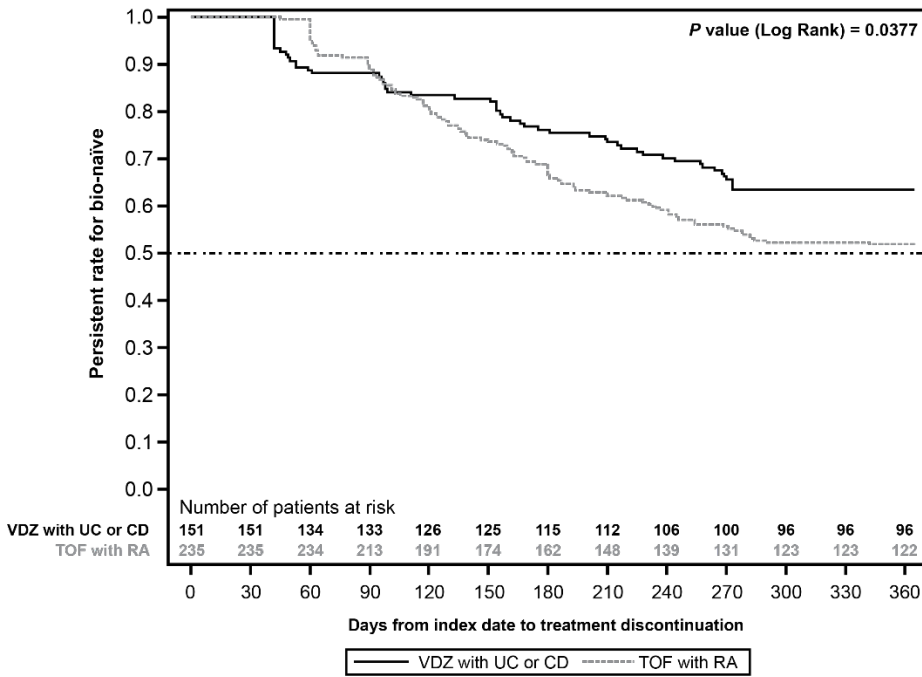

Supplement: 12325_2019_1037_MOESM1_ESM.pdf [file 12325_2019_1037_MOESM1_ESM.pdf]
